# Supplementary material for: Shared decision making in cardiology: a systematic review and meta-analysis
Source: HighWire-hosted journal article supplement (doi:10.1136/heartjnl-2022-321050), 2022-08-25

## **Shared decision making in cardiology – a systematic review and meta-analysis**

Panagiota Mitropoulou, Nicolai Grüner-Hegge, Johannes Reinhold, Charikleia Papadopoulou

### **Supplementary material**

Table S1: PRISMA checklist

Table S2-4: Search strategies for Cochrane, Pubmed and Web of Science

Table S5: Outcomes of included studies – expanded

Table S6: Instruments used for measurement of outcomes in each study

Table S7: Summary of instruments' characteristics

Figure S1: Subgroup analysis for decisional conflict and knowledge stratified according to cardiac condition

Figure S2: Subgroup analysis for decisional conflict and knowledge stratified according to decision aid used

Figure S3: Leave-one-out sensitivity analysis

**Table S1 PRISMA 2020 Checklist**

| Section and Topic             | Item # | Checklist item                                                                                                                                                                                                                                                                                       | Location where item is reported |
|-------------------------------|--------|------------------------------------------------------------------------------------------------------------------------------------------------------------------------------------------------------------------------------------------------------------------------------------------------------|---------------------------------|
| <b>TITLE</b>                  |        |                                                                                                                                                                                                                                                                                                      |                                 |
| Title                         | 1      | Identify the report as a systematic review.                                                                                                                                                                                                                                                          | Title                           |
| <b>ABSTRACT</b>               |        |                                                                                                                                                                                                                                                                                                      |                                 |
| Abstract                      | 2      | See the PRISMA 2020 for Abstracts checklist.                                                                                                                                                                                                                                                         | Abstract                        |
| <b>INTRODUCTION</b>           |        |                                                                                                                                                                                                                                                                                                      |                                 |
| Rationale                     | 3      | Describe the rationale for the review in the context of existing knowledge.                                                                                                                                                                                                                          | Introduction                    |
| Objectives                    | 4      | Provide an explicit statement of the objective(s) or question(s) the review addresses.                                                                                                                                                                                                               | Introduction                    |
| <b>METHODS</b>                |        |                                                                                                                                                                                                                                                                                                      |                                 |
| Eligibility criteria          | 5      | Specify the inclusion and exclusion criteria for the review and how studies were grouped for the syntheses.                                                                                                                                                                                          | Methods                         |
| Information sources           | 6      | Specify all databases, registers, websites, organisations, reference lists and other sources searched or consulted to identify studies. Specify the date when each source was last searched or consulted.                                                                                            | Methods                         |
| Search strategy               | 7      | Present the full search strategies for all databases, registers and websites, including any filters and limits used.                                                                                                                                                                                 | Methods                         |
| Selection process             | 8      | Specify the methods used to decide whether a study met the inclusion criteria of the review, including how many reviewers screened each record and each report retrieved, whether they worked independently, and if applicable, details of automation tools used in the process.                     | Methods                         |
| Data collection process       | 9      | Specify the methods used to collect data from reports, including how many reviewers collected data from each report, whether they worked independently, any processes for obtaining or confirming data from study investigators, and if applicable, details of automation tools used in the process. | Methods                         |
| Data items                    | 10a    | List and define all outcomes for which data were sought. Specify whether all results that were compatible with each outcome domain in each study were sought (e.g. for all measures, time points, analyses), and if not, the methods used to decide which results to collect.                        | Methods                         |
|                               | 10b    | List and define all other variables for which data were sought (e.g. participant and intervention characteristics, funding sources). Describe any assumptions made about any missing or unclear information.                                                                                         | Methods                         |
| Study risk of bias assessment | 11     | Specify the methods used to assess risk of bias in the included studies, including details of the tool(s) used, how many reviewers assessed each study and whether they worked independently, and if applicable, details of automation tools used in the process.                                    | Methods, Table 3                |
| Effect measures               | 12     | Specify for each outcome the effect measure(s) (e.g. risk ratio, mean difference) used in the synthesis or presentation of results.                                                                                                                                                                  | Methods, Figures 2-4            |
| Synthesis methods             | 13a    | Describe the processes used to decide which studies were eligible for each synthesis (e.g. tabulating the study intervention characteristics and comparing against the planned groups for each synthesis (item #5)).                                                                                 | Methods                         |

| Section and Topic             | Item # | Checklist item                                                                                                                                                                                                                                                                       | Location where item is reported |
|-------------------------------|--------|--------------------------------------------------------------------------------------------------------------------------------------------------------------------------------------------------------------------------------------------------------------------------------------|---------------------------------|
|                               | 13b    | Describe any methods required to prepare the data for presentation or synthesis, such as handling of missing summary statistics, or data conversions.                                                                                                                                | Methods                         |
|                               | 13c    | Describe any methods used to tabulate or visually display results of individual studies and syntheses.                                                                                                                                                                               | Methods                         |
|                               | 13d    | Describe any methods used to synthesize results and provide a rationale for the choice(s). If meta-analysis was performed, describe the model(s), method(s) to identify the presence and extent of statistical heterogeneity, and software package(s) used.                          | Methods                         |
|                               | 13e    | Describe any methods used to explore possible causes of heterogeneity among study results (e.g. subgroup analysis, meta-regression).                                                                                                                                                 | Methods                         |
|                               | 13f    | Describe any sensitivity analyses conducted to assess robustness of the synthesized results.                                                                                                                                                                                         | Methods                         |
| Reporting bias assessment     | 14     | Describe any methods used to assess risk of bias due to missing results in a synthesis (arising from reporting biases).                                                                                                                                                              | Methods, Figure 4               |
| Certainty assessment          | 15     | Describe any methods used to assess certainty (or confidence) in the body of evidence for an outcome.                                                                                                                                                                                | Methods                         |
| <b>RESULTS</b>                |        |                                                                                                                                                                                                                                                                                      |                                 |
| Study selection               | 16a    | Describe the results of the search and selection process, from the number of records identified in the search to the number of studies included in the review, ideally using a flow diagram.                                                                                         | Results                         |
|                               | 16b    | Cite studies that might appear to meet the inclusion criteria, but which were excluded, and explain why they were excluded.                                                                                                                                                          | Figure 1                        |
| Study characteristics         | 17     | Cite each included study and present its characteristics.                                                                                                                                                                                                                            | Results, Table 1-2              |
| Risk of bias in studies       | 18     | Present assessments of risk of bias for each included study.                                                                                                                                                                                                                         | Table 3                         |
| Results of individual studies | 19     | For all outcomes, present, for each study: (a) summary statistics for each group (where appropriate) and (b) an effect estimate and its precision (e.g. confidence/credible interval), ideally using structured tables or plots.                                                     | Table 2                         |
| Results of syntheses          | 20a    | For each synthesis, briefly summarise the characteristics and risk of bias among contributing studies.                                                                                                                                                                               | Figure 2-3, Table 3             |
|                               | 20b    | Present results of all statistical syntheses conducted. If meta-analysis was done, present for each the summary estimate and its precision (e.g. confidence/credible interval) and measures of statistical heterogeneity. If comparing groups, describe the direction of the effect. | Results, Figure 2-3             |
|                               | 20c    | Present results of all investigations of possible causes of heterogeneity among study results.                                                                                                                                                                                       | N/A                             |
|                               | 20d    | Present results of all sensitivity analyses conducted to assess the robustness of the synthesized results.                                                                                                                                                                           | Supplement                      |
| Reporting biases              | 21     | Present assessments of risk of bias due to missing results (arising from reporting biases) for each synthesis assessed.                                                                                                                                                              | Figure 4                        |

| Section and Topic                              | Item # | Checklist item                                                                                                                                                                                                                             | Location where item is reported |
|------------------------------------------------|--------|--------------------------------------------------------------------------------------------------------------------------------------------------------------------------------------------------------------------------------------------|---------------------------------|
| Certainty of evidence                          | 22     | Present assessments of certainty (or confidence) in the body of evidence for each outcome assessed.                                                                                                                                        | Results                         |
| <b>DISCUSSION</b>                              |        |                                                                                                                                                                                                                                            |                                 |
| Discussion                                     | 23a    | Provide a general interpretation of the results in the context of other evidence.                                                                                                                                                          | Discussion                      |
|                                                | 23b    | Discuss any limitations of the evidence included in the review.                                                                                                                                                                            | Discussion                      |
|                                                | 23c    | Discuss any limitations of the review processes used.                                                                                                                                                                                      | Discussion                      |
|                                                | 23d    | Discuss implications of the results for practice, policy, and future research.                                                                                                                                                             | Discussion                      |
| <b>OTHER INFORMATION</b>                       |        |                                                                                                                                                                                                                                            |                                 |
| Registration and protocol                      | 24a    | Provide registration information for the review, including register name and registration number, or state that the review was not registered.                                                                                             | Methods                         |
|                                                | 24b    | Indicate where the review protocol can be accessed, or state that a protocol was not prepared.                                                                                                                                             | Methods                         |
|                                                | 24c    | Describe and explain any amendments to information provided at registration or in the protocol.                                                                                                                                            | N/A                             |
| Support                                        | 25     | Describe sources of financial or non-financial support for the review, and the role of the funders or sponsors in the review.                                                                                                              | Title page                      |
| Competing interests                            | 26     | Declare any competing interests of review authors.                                                                                                                                                                                         | Title page                      |
| Availability of data, code and other materials | 27     | Report which of the following are publicly available and where they can be found: template data collection forms; data extracted from included studies; data used for all analyses; analytic code; any other materials used in the review. | N/A                             |

From: Page MJ, McKenzie JE, Bossuyt PM, Boutron I, Hoffmann TC, Mulrow CD, et al. The PRISMA 2020 statement: an updated guideline for reporting systematic reviews. *BMJ* 2021;372:n71. doi: 10.1136/bmj.n71

For more information, visit: <http://www.prisma-statement.org/>

**Tables S2-S4: Search strategy for Cochrane database, PubMed and Web of Science**

Table S2: Cochrane database

| ID | Search                                                                                                                                                                                                                                                                                                                                                                                                                                                                       | Hits    |
|----|------------------------------------------------------------------------------------------------------------------------------------------------------------------------------------------------------------------------------------------------------------------------------------------------------------------------------------------------------------------------------------------------------------------------------------------------------------------------------|---------|
| #1 | ((shar* or inform*) near/3 (decision* or aid* or deciding* or choice*)):ti,ab,kw (Word variations have been searched)                                                                                                                                                                                                                                                                                                                                                        | 4748    |
| #2 | ((decision* or choice*) near/3 (making* or support* or behaviour*)):ti,ab,kw (Word variations have been searched)                                                                                                                                                                                                                                                                                                                                                            | 17061   |
| #3 | ((patient* or consumer*) near/3 (involvement* or involving* or participation* or participating*)):ti,ab,kw (Word variations have been searched)                                                                                                                                                                                                                                                                                                                              | 12970   |
| #4 | ((nurse* or physician* or clinician* or doctor* or general practitioner* or gps or health care professional* or healthcare professional* or health care provider* or healthcare provider* or resident*) near/3 (patient* or consumer* or people*)):ti,ab,kw (Word variations have been searched)                                                                                                                                                                             | 86035   |
| #5 | #1 or (#2 and #3) or (#2 and #4) or (#3 and #4)                                                                                                                                                                                                                                                                                                                                                                                                                              | 10673   |
| #6 | (random*):ti,ab,kw (Word variations have been searched)                                                                                                                                                                                                                                                                                                                                                                                                                      | 1037720 |
| #7 | ((Myocard* or Arrhythm* or Valv* or Fibrill* or Tachycard* or Bradycard* or Heart or Angin* or Coronar* or Ischaemi* or Ischemi* or Card* or Aort* or Mitral or Vascular or Infarct* or Conduction or Channelopathy or "Diastolic dysfunction" or "Systolic dysfunction" or Atri* or Ventric* or Palpitatio* or Arter* or Hypertensi* or Cardiac pac* or Pacemaker or Endocarditis or electrocardiogra* or electrophysiolog*)):ti,ab,kw (Word variations have been searched) | 507265  |
| #8 | #5 AND #6 AND #7                                                                                                                                                                                                                                                                                                                                                                                                                                                             | 3759    |

Table S3: Pubmed

| Search | Query                                                                                                                                                                                                                                                                                                                                                                                                                                | Results                   |
|--------|--------------------------------------------------------------------------------------------------------------------------------------------------------------------------------------------------------------------------------------------------------------------------------------------------------------------------------------------------------------------------------------------------------------------------------------|---------------------------|
| #8     | Search: #5 AND #6 AND #7                                                                                                                                                                                                                                                                                                                                                                                                             | <a href="#">3,132</a>     |
| #7     | Search: (Myocard* or Arrhythm* or Valv* or Fibrill* or Tachycard* or Bradycard* or Heart or Angin* or Coronar* or Ischaemi* or Ischemi* or Card* or Aort* or Mitral or Vascular or Infarct* or Conduction or Channelopathy or "Diastolic dysfunction" or "Systolic dysfunction" or Atri* or Ventric* or Palpitatio* or Arter* or Hypertensi* or Cardiac pac* or Pacemaker or Endocarditis or electrocardiogra* or electrophysiolog*) | <a href="#">8,612,598</a> |
| #6     | Search: random*                                                                                                                                                                                                                                                                                                                                                                                                                      | <a href="#">1,428,482</a> |
| #5     | Search: #1 OR (#2 AND #3) OR (#2 AND #4) OR (#3 AND #4)                                                                                                                                                                                                                                                                                                                                                                              | <a href="#">42,918</a>    |
| #4     | Search: (professional-patient relations[mh] or ((nurses[mh] or physicians[mh] or nurse*[ti] or physician*[ti] or clinician*[ti] or doctor*[ti] or general practitioner*[ti] or gps[ti] or health care professional*[ti] or healthcare professional*[ti] or health care provider*[ti] or healthcare provider*[ti] or resident*[ti]) and (patients[mh] or patient*[ti] or consumer*[ti] or people*[ti])))                              | <a href="#">183,732</a>   |
| #3     | Search: (patient participation[mh] or patient participation*[tiab] or consumer participation*[tiab] or patient involvement*[tiab] or consumer involvement*[tiab] or ((patient*[ti] or consumer*[ti]) and (involvement*[ti] or involving*[ti] or participation*[ti] or participating*[ti])))                                                                                                                                          | <a href="#">38,488</a>    |
| #2     | Search: (decision making[mh:noexp] or decision support techniques[mh:noexp] or decision support systems, clinical[mh] or choice behaviour[mh:noexp] or decision making*[tiab] or decision support*[tiab] or choice behaviour*[tiab] or ((decision*[ti] or choice*[ti]) and (making*[ti] or support*[ti] or behaviour*[ti])))                                                                                                         | <a href="#">262,949</a>   |
| #1     | Search: (shared decision*[tiab] or sharing decision*[tiab] or informed decision*[tiab] or informed choice*[tiab] or decision aid*[tiab] or ((share*[ti] or sharing*[ti] or informed*[ti]) and (decision*[ti] or deciding*[ti] or choice*[ti])))                                                                                                                                                                                      | <a href="#">22,933</a>    |

Table S4: Web Of Science:

|     |                       |                                                                                                                                 |
|-----|-----------------------|---------------------------------------------------------------------------------------------------------------------------------|
|     |                       |                                                                                                                                 |
|     | Results               |                                                                                                                                 |
| Set |                       | Web Of Science Core Collection, search performed on 25/01/2021                                                                  |
|     |                       |                                                                                                                                 |
| # 8 | <a href="#">3.877</a> | #5 AND #6 AND #7                                                                                                                |
|     |                       | <i>Indexes=SCI-EXPANDED, SSCI, A&amp;HCI, CPCI-S, CPCI-SSH, BKCI-S, BKCI-SSH, ESCI, CCR-EXPANDED, IC<br/>Timespan=All years</i> |
|     |                       |                                                                                                                                 |

|     |                           |                                                                                                                                                                                                                                                                                                                                                                                                                                                                                                                                                                                                                                                                                                                                                                                                                                                                                                                                                                                                                                                                                                                                                                                                                                                                                                              |
|-----|---------------------------|--------------------------------------------------------------------------------------------------------------------------------------------------------------------------------------------------------------------------------------------------------------------------------------------------------------------------------------------------------------------------------------------------------------------------------------------------------------------------------------------------------------------------------------------------------------------------------------------------------------------------------------------------------------------------------------------------------------------------------------------------------------------------------------------------------------------------------------------------------------------------------------------------------------------------------------------------------------------------------------------------------------------------------------------------------------------------------------------------------------------------------------------------------------------------------------------------------------------------------------------------------------------------------------------------------------|
| # 7 | <a href="#">4.694.446</a> | <p>TI=(Myocard* or Arrhythm* or Valv* or Fibrill* or Tachycard* or Bradycard* or Heart or Angin* or Coronar* or Ischaemi* or Ischemi* or Card* or Aort* or Mitral or Vascular or Infarct* or Conduction or Channelopathy or "Diastolic dysfunction" or "Systolic dysfunction" or Atri* or Ventric* or Palpitatio* or Arter* or Hypertensi* or Cardiac pac* or Pacemaker or Endocarditis or electrocardiogra* or electrophysiolog*) OR AB=(Myocard* or Arrhythm* or Valv* or Fibrill* or Tachycard* or Bradycard* or Heart or Angin* or Coronar* or Ischaemi* or Ischemi* or Card* or Aort* or Mitral or Vascular or Infarct* or Conduction or Channelopathy or "Diastolic dysfunction" or "Systolic dysfunction" or Atri* or Ventric* or Palpitatio* or Arter* or Hypertensi* or Cardiac pac* or Pacemaker or Endocarditis or electrocardiogra* or electrophysiolog*) OR KP=(Myocard* or Arrhythm* or Valv* or Fibrill* or Tachycard* or Bradycard* or Heart or Angin* or Coronar* or Ischaemi* or Ischemi* or Card* or Aort* or Mitral or Vascular or Infarct* or Conduction or Channelopathy or "Diastolic dysfunction" or "Systolic dysfunction" or Atri* or Ventric* or Palpitatio* or Arter* or Hypertensi* or Cardiac pac* or Pacemaker or Endocarditis or electrocardiogra* or electrophysiolog*)</p> |
|     |                           | <p><i>Indexes=SCI-EXPANDED, SSCI, A&amp;HCI, CPCI-S, CPCI-SSH, BKCI-S, BKCI-SSH, ESCI, CCR-EXPANDED, IC Timespan=All years</i></p>                                                                                                                                                                                                                                                                                                                                                                                                                                                                                                                                                                                                                                                                                                                                                                                                                                                                                                                                                                                                                                                                                                                                                                           |
|     |                           |                                                                                                                                                                                                                                                                                                                                                                                                                                                                                                                                                                                                                                                                                                                                                                                                                                                                                                                                                                                                                                                                                                                                                                                                                                                                                                              |
| # 6 | <a href="#">1.939.078</a> | TI=random* OR AB=random* OR KP=random*                                                                                                                                                                                                                                                                                                                                                                                                                                                                                                                                                                                                                                                                                                                                                                                                                                                                                                                                                                                                                                                                                                                                                                                                                                                                       |



|     |                         |                                                                                                                                 |
|-----|-------------------------|---------------------------------------------------------------------------------------------------------------------------------|
|     |                         | <i>Indexes=SCI-EXPANDED, SSCI, A&amp;HCI, CPCI-S, CPCI-SSH, BKCI-S, BKCI-SSH, ESCI, CCR-EXPANDED, IC<br/>Timespan=All years</i> |
|     |                         |                                                                                                                                 |
| # 5 | <a href="#">233,699</a> | #1 OR (#2 AND #3) OR (#2 AND #4) OR (#3 AND #4)                                                                                 |
|     |                         | <i>Indexes=SCI-EXPANDED, SSCI, A&amp;HCI, CPCI-S, CPCI-SSH, BKCI-S, BKCI-SSH, ESCI, CCR-EXPANDED, IC<br/>Timespan=All years</i> |
|     |                         |                                                                                                                                 |

|     |                         |                                                                                                                                                                                                                                                                                                                                                                                                                                                                                                                                                                                                                                                                                                                                                                                                                                                                                                                                                                                                        |
|-----|-------------------------|--------------------------------------------------------------------------------------------------------------------------------------------------------------------------------------------------------------------------------------------------------------------------------------------------------------------------------------------------------------------------------------------------------------------------------------------------------------------------------------------------------------------------------------------------------------------------------------------------------------------------------------------------------------------------------------------------------------------------------------------------------------------------------------------------------------------------------------------------------------------------------------------------------------------------------------------------------------------------------------------------------|
| # 4 | <a href="#">594.976</a> | <p>TI=(professional-patient relations OR ((nurses OR physicians OR nurse* OR physician* OR clinician* OR doctor* OR general practitioner* OR gps OR health care professional* OR healthcare professional* OR health care provider* OR healthcare provider* OR resident*) AND (patients OR patient* OR consumer* OR people* ) ) ) OR AB=(professional-patient relations OR ((nurses OR physicians OR nurse* OR physician* OR clinician* OR doctor* OR general practitioner* OR gps OR health care professional* OR healthcare professional* OR health care provider* OR healthcare provider* OR resident*) AND (patients OR patient* OR consumer* OR people* ) ) ) OR KP=(professional-patient relations OR ((nurses OR physicians OR nurse* OR physician* OR clinician* OR doctor* OR general practitioner* OR gps OR health care professional* OR healthcare professional* OR health care provider* OR healthcare provider* OR resident*) AND (patients OR patient* OR consumer* OR people* ) ) )</p> |
|     |                         | <p><i>Indexes=SCI-EXPANDED, SSCI, A&amp;HCI, CPCI-S, CPCI-SSH, BKCI-S, BKCI-SSH, ESCI, CCR-EXPANDED, IC Timespan=All years</i></p>                                                                                                                                                                                                                                                                                                                                                                                                                                                                                                                                                                                                                                                                                                                                                                                                                                                                     |
|     |                         |                                                                                                                                                                                                                                                                                                                                                                                                                                                                                                                                                                                                                                                                                                                                                                                                                                                                                                                                                                                                        |

|     |                         |                                                                                                                                                                                                                                                                                                                                                                                                                                                                                                                                                                                                                                                                                                                       |
|-----|-------------------------|-----------------------------------------------------------------------------------------------------------------------------------------------------------------------------------------------------------------------------------------------------------------------------------------------------------------------------------------------------------------------------------------------------------------------------------------------------------------------------------------------------------------------------------------------------------------------------------------------------------------------------------------------------------------------------------------------------------------------|
| # 3 | <a href="#">326.204</a> | <p>TI=(patient participation OR patient participation* OR consumer participation* OR patient involvement* OR consumer involvement* OR ((patient* OR consumer*) AND (involvement* OR involving* OR participation* OR participating*))) OR AB=(patient participation OR patient participation* OR consumer participation* OR patient involvement* OR consumer involvement* OR ((patient* OR consumer*) AND (involvement* OR involving* OR participation* OR participating*))) OR KP=(patient participation OR patient participation* OR consumer participation* OR patient involvement* OR consumer involvement* OR ((patient* OR consumer*) AND (involvement* OR involving* OR participation* OR participating*)))</p> |
|     |                         | <p><i>Indexes=SCI-EXPANDED, SSCI, A&amp;HCI, CPCI-S, CPCI-SSH, BKCI-S, BKCI-SSH, ESCI, CCR-EXPANDED, IC Timespan=All years</i></p>                                                                                                                                                                                                                                                                                                                                                                                                                                                                                                                                                                                    |
|     |                         |                                                                                                                                                                                                                                                                                                                                                                                                                                                                                                                                                                                                                                                                                                                       |

|     |                         |                                                                                                                                                                                                                                                                                                                                                                                                                                                                                                                                                                                                                                                                                                                                                                                                                                                                                        |
|-----|-------------------------|----------------------------------------------------------------------------------------------------------------------------------------------------------------------------------------------------------------------------------------------------------------------------------------------------------------------------------------------------------------------------------------------------------------------------------------------------------------------------------------------------------------------------------------------------------------------------------------------------------------------------------------------------------------------------------------------------------------------------------------------------------------------------------------------------------------------------------------------------------------------------------------|
| # 2 | <a href="#">703.259</a> | <p>TI=(decision making OR decision support techniques OR decision support systems, clinical OR choice behaviour OR decision making OR decision support* OR choice behaviour*OR ((decision* OR choice*) AND (making*OR support*OR behaviour* ) ) OR AB=(decision making OR decision support techniques OR decision support systems, clinical OR choice behaviour OR decision making OR decision support* OR choice behaviour*OR ((decision* OR choice*) AND (making*OR support*OR behaviour* ) ) OR KP=(decision making OR decision support techniques OR decision support systems, clinical OR choice behaviour OR decision making OR decision support* OR choice behaviour*OR ((decision* OR choice*) AND (making*OR support*OR behaviour* ) )</p> <p><i>Indexes=SCI-EXPANDED, SSCI, A&amp;HCI, CPCI-S, CPCI-SSH, BKCI-S, BKCI-SSH, ESCI, CCR-EXPANDED, IC Timespan=All years</i></p> |
|     |                         |                                                                                                                                                                                                                                                                                                                                                                                                                                                                                                                                                                                                                                                                                                                                                                                                                                                                                        |
| # 1 | <a href="#">155.420</a> | <p>TI=(shared decision* OR sharing decision* OR informed decision* OR informed choice* OR decision aid* OR ((share* OR sharing* OR informed*) AND (decision* OR deciding* OR choice* ) ) OR AB=(shared decision* OR sharing decision* OR informed decision* OR informed choice* OR decision aid* OR ((share* OR sharing* OR informed*) AND (decision* OR deciding* OR choice* ) ) OR KP=(shared decision* OR sharing decision* OR informed decision* OR informed choice* OR decision aid* OR ((share* OR sharing* OR informed*) AND (decision* OR deciding* OR choice* ) )</p>                                                                                                                                                                                                                                                                                                         |

|  |  |                                                                                                                                 |
|--|--|---------------------------------------------------------------------------------------------------------------------------------|
|  |  | <i>Indexes=SCI-EXPANDED, SSCI, A&amp;HCI, CPCI-S, CPCI-SSH, BKCI-S, BKCI-SSH, ESCI, CCR-EXPANDED, IC<br/>Timespan=All years</i> |
|  |  |                                                                                                                                 |
|  |  | Timespan                                                                                                                        |
|  |  | All years (1900 - 2021)                                                                                                         |
|  |  |                                                                                                                                 |
|  |  | Web of Science Core Collection: Citation Indexes                                                                                |
|  |  | Science Citation Index Expanded (SCI-EXPANDED) --1900-present                                                                   |
|  |  | Social Sciences Citation Index (SSCI) --1900-present                                                                            |
|  |  | Arts & Humanities Citation Index (A&HCI) --1975-present                                                                         |
|  |  | Conference Proceedings Citation Index- Science (CPCI-S) --1990-present                                                          |
|  |  | Conference Proceedings Citation Index- Social Science & Humanities (CPCI-SSH) --1990-present                                    |
|  |  | Book Citation Index- Science (BKCI-S) --2008-present                                                                            |

|  |  |                                                                                              |
|--|--|----------------------------------------------------------------------------------------------|
|  |  | Book Citation Index– Social Sciences & Humanities (BKCI-SSH) --2008-present                  |
|  |  | Emerging Sources Citation Index (ESCI) --2015-present                                        |
|  |  | Web of Science Core Collection: Chemical Indexes                                             |
|  |  | Current Chemical Reactions (CCR-EXPANDED) --1985-present                                     |
|  |  | <i>(Includes Institut National de la Propriete Industrielle structure data back to 1840)</i> |
|  |  | Index Chemicus (IC) --1993-present                                                           |

**Table S5: Outcomes of included studies - expanded**

| Reference    |      | Decisional conflict<br>(mean (SD), unless<br>stated otherwise; 100<br>point scale unless stated<br>otherwise) | Decisional<br>regret (mean<br>(SD), unless<br>stated<br>otherwise) | Decisional<br>satisfaction<br>(mean (SD),<br>unless stated<br>otherwise) | Decisional anxiety<br>(mean (SD),<br>unless stated<br>otherwise) | Knowledge / Specified SDM<br>scale (mean (SD), unless<br>stated otherwise) |
|--------------|------|---------------------------------------------------------------------------------------------------------------|--------------------------------------------------------------------|--------------------------------------------------------------------------|------------------------------------------------------------------|----------------------------------------------------------------------------|
| <b>Allen</b> | 2018 | Control (UC), mean (SE):                                                                                      | Control (UC),                                                      |                                                                          |                                                                  | Control (UC), mean% (SE):                                                  |

|                |      |                                                                                                                                                                                                                                                                                                                                                  |                                                                                                                                                         |                                                             |  |                                                                                                                                                                                                                                                                                                                                           |
|----------------|------|--------------------------------------------------------------------------------------------------------------------------------------------------------------------------------------------------------------------------------------------------------------------------------------------------------------------------------------------------|---------------------------------------------------------------------------------------------------------------------------------------------------------|-------------------------------------------------------------|--|-------------------------------------------------------------------------------------------------------------------------------------------------------------------------------------------------------------------------------------------------------------------------------------------------------------------------------------------|
|                |      | <ul style="list-style-type: none"> <li>- BL1 20.2 (1.99)</li> <li>- BL2 16.5 (1.95)</li> <li>- 1mo 15.5 (1.89)</li> <li>- 6mo 15.4 (1.89)</li> </ul> <p>Intervention (PtDA), mean (SE):</p> <ul style="list-style-type: none"> <li>- BL1 23.4 (2.24)</li> <li>- BL2 18.4 (2.23)</li> <li>- 1mo 17.9 (2.17)</li> <li>- 6mo 14.2 (2.21)</li> </ul> | <p>mean (SE):</p> <p>1mo = 14.3 (2.15)</p> <p>6mo 12.1 (2.28);</p> <p>Intervention (PtDA), mean (SE):</p> <p>1mo 17.9 (2.84)</p> <p>6mo 19.1 (2.96)</p> |                                                             |  | <ul style="list-style-type: none"> <li>- BL1 59.5 (1.9)</li> <li>- BL2 64.9 (1.8)</li> <li>- 1mo 67.8 (1.9)</li> <li>- 6mo 68.6 (1.8)</li> </ul> <p>Intervention (PtDA), mean% (SE):</p> <ul style="list-style-type: none"> <li>- BL1 59.1 (2.2)</li> <li>- BL2 70.0 (2.1)</li> <li>- 1mo 66.4 (2.3)</li> <li>- 6mo 67.1 (2.2)</li> </ul> |
| <b>Carroll</b> | 2017 | <p>Pre consult, mean (SD):</p> <ul style="list-style-type: none"> <li>- UC = 49.4 (18.6)</li> <li>- PtDA = 27.3 (18.4)</li> </ul> <p>Post implant, mean (SD):</p> <ul style="list-style-type: none"> <li>- UC = 29.9 (13.3)</li> <li>- PtDA = 21.2 (11.7)</li> </ul>                                                                             |                                                                                                                                                         |                                                             |  | <p>The number (%) of participants scoring greater than 3/5 of the knowledge questions correct</p> <ul style="list-style-type: none"> <li>- PtDA = 19 (47.5)</li> <li>- UC = 9 (23.1)</li> </ul>                                                                                                                                           |
| <b>Case</b>    | 2019 | <p>PtDA group had increased medical knowledge of CAD (p&lt;0.001) and decreased decisional conflict (p&lt;0.001); specific values</p>                                                                                                                                                                                                            |                                                                                                                                                         | <p>Both groups reported high satisfaction with decision</p> |  | <p>Performance on questionnaire devised by authors:</p> <ul style="list-style-type: none"> <li>- PtDA 81 % (mean 8.05+/-1.29)</li> <li>- UC 70% (mean 6.94+/-</li> </ul>                                                                                                                                                                  |

|                    |      |                                                                                                                                                                                     |  |  |  |                                                                                                                                                                                                                                                                      |
|--------------------|------|-------------------------------------------------------------------------------------------------------------------------------------------------------------------------------------|--|--|--|----------------------------------------------------------------------------------------------------------------------------------------------------------------------------------------------------------------------------------------------------------------------|
|                    |      | not provided.                                                                                                                                                                       |  |  |  | 1.44)                                                                                                                                                                                                                                                                |
| <b>Coylewright</b> | 2016 | PtDA = 18.5 (CI 14.8 to 22.3)<br>UC = 21.5 (CI 17.4 to 25.7)                                                                                                                        |  |  |  | PtDA = 60.3% (CI 47.5 to 73.2)<br>UC = 39.6% (CI 25.5 to 53.7)                                                                                                                                                                                                       |
| <b>Doll</b>        | 2019 | UC = 24.3 (15.8)<br>PtDA = 21.3 (14.0)                                                                                                                                              |  |  |  | Performance on 6-item survey:<br>- UC = 2.2 (1.0)<br>- PtDA = 2.7 (1.3)                                                                                                                                                                                              |
| <b>Fraenkel</b>    | 2012 | Informed subscale of DCS (no SE provided for values):<br>- PtDA = 13.0<br>- UC = 24.8<br>Values clarity subscale of DCS (no SE provided for values):<br>- PtDA = 6.4<br>- UC = 21.0 |  |  |  | Performance on questionnaire assessing knowledge of medications (no SE provided for values):<br>- PtDA = 61%<br>- UC = 31%<br>Performance on questionnaire assessing knowledge of medication side effects (no SE provided for values):<br>- PtDA = 49%<br>- UC = 37% |
| <b>Hess</b>        | 2012 | PtDA = 22.3 (CI 18.1 - 26.4)<br>UC 43.3 (CI 32.2 - 39.6)                                                                                                                            |  |  |  | Seven knowledge questions:<br>- PtDA = 3.6 (CI 3.4-3.9)<br>- UC = 3.0 (CI 2.7-3.2)<br>Correctly assessed 45-d risk for ACS:<br>- PtDA = 24 patients                                                                                                                  |



|             |      |                                                   |  |  |  |                                                                                                                                                                                                                                                                                                                                                                                                                                                                                                                                                                                                    |
|-------------|------|---------------------------------------------------|--|--|--|----------------------------------------------------------------------------------------------------------------------------------------------------------------------------------------------------------------------------------------------------------------------------------------------------------------------------------------------------------------------------------------------------------------------------------------------------------------------------------------------------------------------------------------------------------------------------------------------------|
|             |      |                                                   |  |  |  | <p>(25%)</p> <ul style="list-style-type: none"> <li>- UC = 1 patient (1%)</li> </ul> <p>OPTION scale:</p> <ul style="list-style-type: none"> <li>- PtDA 26.6 (CI 24.9 - 28.2)</li> <li>- UC 7.0 (CI 5.9 - 8.1)</li> </ul>                                                                                                                                                                                                                                                                                                                                                                          |
| <b>Hess</b> | 2016 | <p>PtDA = 43.5 (15.3)</p> <p>UC = 46.4 (14.8)</p> |  |  |  | <p>Eight knowledge questions:</p> <ul style="list-style-type: none"> <li>- PtDA = 4.2 (1.5%)</li> <li>- UC = 3.6 (1.5%)</li> </ul> <p>Correctly assessed 45 day risk for ACS:</p> <ul style="list-style-type: none"> <li>- PtDA = 10 patients (2.2%)</li> <li>- UC = 2 patients (0.4%)</li> </ul> <p>Correctly assessed 45 day risk for ACS within 10%:</p> <ul style="list-style-type: none"> <li>- PtDA = 293 patients (65.0%)</li> <li>- UC = 81 patients (18.1%)</li> </ul> <p>OPTION scale:</p> <ul style="list-style-type: none"> <li>- PtDA = 18.3(9.4)</li> <li>- UC = 7.9(5.4)</li> </ul> |

|                 |      |                                                                                                                                                                                                                                               |                                                   |                                                   |  |                                                                                                                                                                                                                                                                                                                                                                                                                                                                                                                                                                                                                             |
|-----------------|------|-----------------------------------------------------------------------------------------------------------------------------------------------------------------------------------------------------------------------------------------------|---------------------------------------------------|---------------------------------------------------|--|-----------------------------------------------------------------------------------------------------------------------------------------------------------------------------------------------------------------------------------------------------------------------------------------------------------------------------------------------------------------------------------------------------------------------------------------------------------------------------------------------------------------------------------------------------------------------------------------------------------------------------|
| <b>Holbrook</b> | 2007 | Mean total DCS (5 point scale) = 2.1 (SD 0.4); no UC group for comparison in this study                                                                                                                                                       |                                                   |                                                   |  | Significant improvement in knowledge of AF after PtDA regardless of format (p<0.01); no UC group for comparison in this study                                                                                                                                                                                                                                                                                                                                                                                                                                                                                               |
| <b>Kostick</b>  | 2018 | <p>PtDA:</p> <ul style="list-style-type: none"> <li>- Baseline = 23.1 (20.7)</li> <li>- 1-week = 15.7 (11.8)</li> </ul> <p>UC:</p> <ul style="list-style-type: none"> <li>- Baseline = 29.3 (19.3)</li> <li>- 1-week = 17.4 (14.7)</li> </ul> | <p>PtDA = 11.5 (13.3)</p> <p>UC = 12.9 (16.6)</p> | <p>PtDA = 82.5 (13.8)</p> <p>UC = 82.8 (16.1)</p> |  | <p>Questionnaire with total sum 100 points</p> <p>PtDA:</p> <ul style="list-style-type: none"> <li>- Baseline = 45.6 (22.2)</li> <li>- 1-week = 67.8 (15.6)</li> <li>- 1-month = 64.3 (14.0)</li> </ul> <p>UC:</p> <ul style="list-style-type: none"> <li>- Baseline = 43.8 (18.3)</li> <li>- 1-week = 59.3 (12.4)</li> <li>- 1-month = 60.6 (12.0)</li> </ul> <p>CollaboRATE</p> <p>PtDA</p> <ul style="list-style-type: none"> <li>- 1-week = 88.4 (19.3)</li> <li>- 1-month = 90.4 (14.3)</li> </ul> <p>UC</p> <ul style="list-style-type: none"> <li>- 1-week = 90.0 (15.6)</li> <li>- 1-month = 89.8 (17.2)</li> </ul> |

|                 |      |                                                                                                        |  |  |  |                                                                                                                                                                                                                                                                                     |
|-----------------|------|--------------------------------------------------------------------------------------------------------|--|--|--|-------------------------------------------------------------------------------------------------------------------------------------------------------------------------------------------------------------------------------------------------------------------------------------|
|                 |      |                                                                                                        |  |  |  | SDM-9:<br>PtDA<br>- 1-week = 84.8 (16.8)<br>- 1-month = 87.5 (12.8)<br>UC<br>- 1-week = 84.3 (13.6)<br>- 1-month = 85.2 (15.0)                                                                                                                                                      |
| <b>Kunneman</b> | 2020 | PtDA = 16.6 (14.4)<br>UC = 17.9 (14.9)<br>Difference -1.2 (-3.2 to 0.6).                               |  |  |  | Scoring 5 or 6 correct of total 6 questions about anticoagulation treatment for AF:<br>- PtDA = 77.5%<br>- UC = 72.5%<br>- No significant difference; P = 0.15<br><br>OPTION-12:<br>- PtDA = 33 (10.8)<br>- UC = 29.1 (13.1)<br>- Adjusted mean difference 4.2 (2.8 and 5.6) points |
| <b>Lewis</b>    | 2020 | 2-4 Weeks:<br>- PtDA = 8.0 (13.8)<br>- UC = 14.3 (18.4)<br>- Group difference = -6.2 (CI -18.7 to 6.2) |  |  |  | Knowledge only assessed at 2-4 weeks, assessed using 6 true or false questions:<br>- PtDA = 77.4% (16.8)<br>- UC = 51.1% (24.0)                                                                                                                                                     |

|                     |      |                                                                                                                                                                                                                                                                                                                                              |  |                                                                              |  |                                                                                                                                                                                                                                                                                                                                                                                                           |
|---------------------|------|----------------------------------------------------------------------------------------------------------------------------------------------------------------------------------------------------------------------------------------------------------------------------------------------------------------------------------------------|--|------------------------------------------------------------------------------|--|-----------------------------------------------------------------------------------------------------------------------------------------------------------------------------------------------------------------------------------------------------------------------------------------------------------------------------------------------------------------------------------------------------------|
|                     |      | <p>6 Months:</p> <ul style="list-style-type: none"> <li>- PtDA = 16.2 (13.5)</li> <li>- UC = 14.6 (16.1)</li> <li>- Group difference = 1.6 (CI -10 to 13.3)</li> </ul> <p>12 Months:</p> <ul style="list-style-type: none"> <li>- PtDA = 14.1 (17.1)</li> <li>- UC = 11.4 (13.7)</li> <li>- Group difference = 2.7 (-9.8 to 15.1)</li> </ul> |  |                                                                              |  | <ul style="list-style-type: none"> <li>- Group difference = 26.3% (CI 10.4 to 42.1)</li> </ul>                                                                                                                                                                                                                                                                                                            |
| <b>McAlister</b>    | 2005 | <p>5 Point Scale</p> <ul style="list-style-type: none"> <li>- PtDA = 1.6 (SD 0.5)</li> <li>- UC = 1.7 (SD 0.5)</li> <li>- p=0.05</li> </ul>                                                                                                                                                                                                  |  |                                                                              |  |                                                                                                                                                                                                                                                                                                                                                                                                           |
| <b>Man-Son-Hing</b> | 1999 | <p>5-Point Scale</p> <ul style="list-style-type: none"> <li>- PtDA = 1.65 (0.45)</li> <li>- UC = 1.74 (0.54)</li> <li>- No statistically significant difference (P=0.14)</li> </ul>                                                                                                                                                          |  | <p>PtDA = 96.4%</p> <p>UC = 95.3%</p> <p>Difference 1.1 (no CI provided)</p> |  | <p>Assessed with 24 knowledge questions.</p> <p>AF and stroke related (6 questions):</p> <ul style="list-style-type: none"> <li>- PtDA = 93.4%</li> <li>- UC = 90.2%</li> <li>- Difference = 3.2 (CI -4.5 to 10.9)</li> </ul> <p>Aspirin- related (9 questions):</p> <ul style="list-style-type: none"> <li>- PtDA = 68.3%</li> <li>- UC = 52.4%</li> <li>- Difference = 15.9 (CI 4.6 to 27.2)</li> </ul> |

|                |      |                                                                                                                                                         |  |                                                   |                                           |                                                                                                                                                                                                                                                                                                                                                                                                      |
|----------------|------|---------------------------------------------------------------------------------------------------------------------------------------------------------|--|---------------------------------------------------|-------------------------------------------|------------------------------------------------------------------------------------------------------------------------------------------------------------------------------------------------------------------------------------------------------------------------------------------------------------------------------------------------------------------------------------------------------|
|                |      |                                                                                                                                                         |  |                                                   |                                           | Warfarin-related (9 questions):<br><ul style="list-style-type: none"> <li>- PtDA = 78.4 %</li> <li>- UC = 63.5%</li> <li>- Difference = 14.9 (CI 4.6 to 25.2)</li> </ul>                                                                                                                                                                                                                             |
| <b>Morgan</b>  | 2000 |                                                                                                                                                         |  | PtDA vs UC:<br>71% vs 70% (CI -3% to 7%, p = 0.5) |                                           | 20 true/false questions (15 for patients not eligible for angioplasty). Reported on mean percentage score. PtDA vs UC: 75% vs 62% (CI 8% to 18%, p<0.001)                                                                                                                                                                                                                                            |
| <b>Schwalm</b> | 2012 | PtDA = 14.8 (10.5)<br>UC = 19.5 (16.7)<br>p=0.04                                                                                                        |  |                                                   |                                           | Assessed with 5 questions.<br><ul style="list-style-type: none"> <li>- PtDA = 3.0/5 (1.5)</li> <li>- UC = 2.0/5 (1.3)</li> <li>- p&lt;0.01</li> </ul>                                                                                                                                                                                                                                                |
| <b>Thomas</b>  | 2013 | DCS total score (Overall patients):<br><ul style="list-style-type: none"> <li>- PtDA = 35 (2.9)</li> <li>- UC = 34.1 (3.5)</li> <li>- p=0.33</li> </ul> |  |                                                   |                                           | Knowledge of SCA and ICDs improvement (Overall Patients):<br><ul style="list-style-type: none"> <li>- PtDA = 8.4 (2.7) to 10.8 (2.1)</li> <li>- UC = 7.4 (3.9) to 9.7 (2.9)</li> <li>- No significant difference</li> </ul> Information retention at 1 week:<br><ul style="list-style-type: none"> <li>- PtDA = 10.8 (1.5)</li> <li>- UC = 9.0 (4.1)</li> <li>- No significant difference</li> </ul> |
| <b>Thomson</b> | 2007 | Pre Clinic PtDA vs UC:<br>Difference = 0.02 (-0.22 to                                                                                                   |  |                                                   | Overall pre and post clinic mean change = | Knowledge scores (0-10) reported separately for aspirin                                                                                                                                                                                                                                                                                                                                              |

|  |  |                                                                                                                                                              |  |  |                                                                                                        |                                                                                                                                  |
|--|--|--------------------------------------------------------------------------------------------------------------------------------------------------------------|--|--|--------------------------------------------------------------------------------------------------------|----------------------------------------------------------------------------------------------------------------------------------|
|  |  | 0.26)<br>Post clinic PtDA vs UC:<br>Difference = -0.18 (CI -0.34 to -0.01)<br><br>At 3 month follow up, PtDA vs UC:<br>Difference = -0.15 (CI -0.37 to 0.06) |  |  | -4.57 (CI -6.3 to -2.84); no significant difference between PtDA and UC groups in reduction in anxiety | and warfarin for each group at pre-clinic, post clinic and at 3 months. No difference was found at any point between PtDA vs UC. |
|--|--|--------------------------------------------------------------------------------------------------------------------------------------------------------------|--|--|--------------------------------------------------------------------------------------------------------|----------------------------------------------------------------------------------------------------------------------------------|

**Table S6: Instruments used for measurement of outcomes in each study**

| Reference |      | Outcomes measured   | Instrument used                                        | Time points of measurement  |
|-----------|------|---------------------|--------------------------------------------------------|-----------------------------|
| Allen     | 2018 | Decisional conflict | Decisional conflict scale - Validated (O'Connor et al) | Baseline, 1 month, 6 months |
|           |      | Decisional regret   | Decision regret scale - Validated (Brehaut et al)      | 1 month, 6 months           |

|                    |      |                         |                                                                                                                                                      |                                                                      |
|--------------------|------|-------------------------|------------------------------------------------------------------------------------------------------------------------------------------------------|----------------------------------------------------------------------|
|                    |      | Knowledge               | 10 item knowledge test developed by the research team and validated by clinicians and patients                                                       | Baseline, 1 month, 6 months                                          |
| <b>Carroll</b>     | 2017 | Decisional conflict     | 1. Decisional conflict scale (as above)<br>2. SURE test (4 item screening test – Developed by Legare et al, validated by Ferron et al)               | Prior to intervention and following the procedure (ICD implantation) |
|                    |      | Knowledge               | 5 knowledge-based questions developed by the interdisciplinary team                                                                                  | Prior to intervention and following the procedure (ICD implantation) |
| <b>Case</b>        | 2019 | Decisional conflict     | Decisional conflict scale (as above)                                                                                                                 | Not specified                                                        |
|                    |      | Decisional satisfaction | Decisional satisfaction scale developed by Holmes-Rovner et al                                                                                       | Not specified                                                        |
|                    |      | Knowledge               | 10 item quiz developed by the research team                                                                                                          | Not specified                                                        |
| <b>Coylewright</b> | 2016 | Decisional conflict     | Decisional conflict scale (as above)                                                                                                                 | Pre- and post- intervention                                          |
|                    |      | Knowledge               | Total correct out of 10 questions developed by the research team, and specific knowledge that PCI does not reduce risk of MI compared with OMT alone | Pre- and post- intervention                                          |
| <b>Doll</b>        | 2019 | Decisional conflict     | Decisional conflict scale (as above)                                                                                                                 | Pre- and post- intervention                                          |
|                    |      | Knowledge               | 6 item knowledge scale developed by the research team                                                                                                | Pre- and post- intervention                                          |
| <b>Fraenkel</b>    | 2012 | Decisional              | Informed and Values Clarity subscales of the Decisional                                                                                              | Pre- and post- intervention                                          |

|                 |      | conflict                | Conflict Scale                                           |                                                         |
|-----------------|------|-------------------------|----------------------------------------------------------|---------------------------------------------------------|
|                 |      | Knowledge               | Knowledge scale developed by research team               | Pre- and post- intervention                             |
| <b>Hess</b>     | 2012 | Decisional conflict     | Decisional conflict scale (as above)                     | 30 days post intervention                               |
|                 |      | Knowledge               | 7 item knowledge scale developed by research team        | 30 days post intervention                               |
| <b>Hess</b>     | 2016 | Decisional conflict     | Decisional conflict scale (as above)                     | Pre- and post- intervention                             |
|                 |      | Knowledge               | Knowledge scale developed by the research team           | Pre- and post- intervention                             |
| <b>Holbrook</b> | 2007 | Decisional conflict     | Decisional conflict scale (as above)                     | Pre- and post- intervention                             |
|                 |      | Knowledge               | 10 item knowledge scale developed by the research team   | Pre- and post- intervention                             |
| <b>Kostick</b>  | 2018 | Decisional conflict     | Decisional conflict scale (as above)                     | Immediately post intervention, and at 1 week            |
|                 |      | Decisional regret       | Decision regret scale (as above)                         | 1 month post intervention                               |
|                 |      | Decisional satisfaction | Decisional satisfaction scale (as above)                 | 1 month post intervention                               |
|                 |      | Knowledge               | Validated knowledge scale developed by the research team | Immediately post intervention, at 1 week and at 1 month |
| <b>Kunneman</b> | 2020 | Decisional              | Decisional conflict scale (as above)                     | Pre- and post- intervention                             |



|                     |      |                         |                                                                                                 |                                                                                     |
|---------------------|------|-------------------------|-------------------------------------------------------------------------------------------------|-------------------------------------------------------------------------------------|
|                     |      | conflict                |                                                                                                 |                                                                                     |
|                     |      | Knowledge               | Knowledge scale developed by the research team                                                  | Pre- and post- intervention                                                         |
| <b>Lewis</b>        | 2020 | Decisional conflict     | Decisional conflict scale (as above)                                                            | 2-4 weeks post intervention, 6 months, 12 months                                    |
|                     |      | Knowledge               | 6 true/false questions developed by the research team                                           | 2-4 weeks post intervention                                                         |
| <b>McAlister</b>    | 2005 | Decisional conflict     | Decisional conflict scale (as above)                                                            | 2 weeks post intervention                                                           |
|                     |      | Knowledge               | Estimate of biannual stroke risk                                                                | 2 weeks post intervention                                                           |
| <b>Man-Son-Hing</b> | 1999 | Decisional conflict     | Decisional conflict scale (as above)                                                            | 1-4 days post intervention                                                          |
|                     |      | Decisional satisfaction | 6 questions using 5-point Likert scale                                                          | 1-4 days post intervention                                                          |
|                     |      | Knowledge               | 23 item knowledge scale developed by the research team                                          | 1-4 days post intervention                                                          |
| <b>Morgan</b>       | 2000 | Decisional satisfaction | 12 Item decision making process questionnaire developed by Barry et al (with small adjustments) | Pre- intervention and at the time of treatment (at least 1 month post intervention) |
|                     |      | Knowledge               | 20 true/false questions developed by the research team                                          | Pre- intervention and at the time of treatment (at least 1 month post intervention) |
| <b>Schwalm</b>      | 2012 | Decisional              | Decisional conflict scale (as above)                                                            | Not specified                                                                       |

|                |      |                     |                                                            |                                                   |
|----------------|------|---------------------|------------------------------------------------------------|---------------------------------------------------|
|                |      | conflict            |                                                            |                                                   |
|                |      | Knowledge           | Knowledge scale developed by the research team             | Not specified                                     |
| <b>Thomas</b>  | 2013 | Decisional conflict | Decisional conflict scale (as above)                       | 1 week post intervention                          |
|                |      | Knowledge           | 13-item knowledge scale developed by the research team     | Pre-intervention, post-intervention, after 1 week |
| <b>Thomson</b> | 2007 | Decisional conflict | Decisional conflict scale (as above)                       | Pre-intervention, post-intervention, at 3 months  |
|                |      | Decisional anxiety  | State Trait Anxiety Inventory developed by Spielberg et al | Pre-intervention, post-intervention               |
|                |      | Knowledge           | Knowledge scale                                            | Pre-intervention, post-intervention, at 3 months  |

O'Connor AM. User Manual - Decisional Conflict Scale (16 item question format) [document on the internet]. Ottawa: Ottawa Hospital Research Institute; Copyright 1993 [updated 2010; cited 2011 07 25]. 16p. Available from [https://decisionaid.ohri.ca/docs/develop/User\\_Manuals/UM\\_Decisional\\_Conflict.pdf](https://decisionaid.ohri.ca/docs/develop/User_Manuals/UM_Decisional_Conflict.pdf).

O'Connor AM. Validation of a decisional conflict scale. *Med Decis Mak.* 1995; 15:25–30.

O'Connor AM, Bennett CL, Stacey D, Barry M, Col NF, Eden KB, Entwistle VA, Fiset V, Holmes-Rovner M, Khangura S, Llewellyn-Thomas H, Rovner D. Decision aids for people facing health treatment or screening decisions. *Cochrane Database Syst Rev.* 2009;(3):CD001431.

Legare F, Kearing S, Clay K, Gagnon S, D'Amours D, Rousseau M, O'Connor A. Are you SURE?: Assessing patient decisional conflict with a 4-item screening test. *Can Fam Physician.* 2010;56:e308–14.

Ferron Parayre A, Labrecque M, Rousseau M, Turcotte S, Legare F. Validation of SURE, a four-item clinical checklist for detecting decisional conflict in patients. *Med Decis Mak.* 2014;34:54–62.

Holmes-Rovner M, Kroll J, Schmitt N, et al. Patient satisfaction with health care decisions: the satisfaction with decision scale. *Med Decis Making* 1996;16:58–64.

Brehaut JC, O'Connor AM, Wood TJ, Hack TF, Siminoff L, Gordon E and Feldman- Stewart D. Validation of a decision regret scale. *Medical Decision Making*. 2003;23:281-292

Michael J. Barry and Daniel C. Cherkin and C. Yuchiao and Floyd J. Fowler and Steven J Skates, A Randomized Trial of a Multimedia Shared Decision-Making Program for Men Facing a Treatment Decision for Benign Prostatic Hyperplasia. *Management and Clinical Outcomes*. 1997;1:5-14

Spielberger CD, Gorsuch RL, Lushene RE. The state-trait anxiety inventory. Palo Alto, California: Consulting Psychologists Press, 1969.

**Table S7: Summary of instruments' characteristics**

|                            | <b>Instrument used</b>                  | <b>What is being measured</b>                                                                                                     | <b>Why is it being measured</b>                                                                                                   | <b>How is it being measured</b>                                                                           | <b>Psychometric properties</b>   |
|----------------------------|-----------------------------------------|-----------------------------------------------------------------------------------------------------------------------------------|-----------------------------------------------------------------------------------------------------------------------------------|-----------------------------------------------------------------------------------------------------------|----------------------------------|
| <b>Decisional conflict</b> | Well validated scale:<br><br>Decisional | 1) Health-care consumers' uncertainty in making a health-related decision; 2) the factors contributing to the uncertainty; and 3) | Lowering decisional conflict (through intervention) increases the feeling of making a better decision, avoidance of 'changing the | Various formats: clinical practice format (1 version), and research format (3 versions) statement format, | Very frequently used in research |

|                          |                                       |                                                            |                                                                                                      |                                                       |                                                                                                                                                                                                                                                                                                                                                 |
|--------------------------|---------------------------------------|------------------------------------------------------------|------------------------------------------------------------------------------------------------------|-------------------------------------------------------|-------------------------------------------------------------------------------------------------------------------------------------------------------------------------------------------------------------------------------------------------------------------------------------------------------------------------------------------------|
|                          | conflict scale (A.M. O'Connor)        | health-care consumers' perceived effective decision making | mind' and higher satisfaction.                                                                       | question format, low literacy format. See link below. | <p>Reliability:<br/>Test-retest correlations and Cronbach's alpha &gt;0.78</p> <p>Construct validity:<br/>-Related to constructs of knowledge, regret, and discontinuance.<br/>-Discriminated between groups who make and delay decisions</p> <p>Tool response to change<br/>-before and after studies</p> <p>Possesses predictive validity</p> |
| <b>Decisional regret</b> | Well validated scale:<br><br>Decision | Distress or remorse after a health care decision           | Greater involvement of patients in health care decisions may lead to higher levels of regret, a very | Five statements rated on a 5-point Likert scale:      | Very frequently used in research                                                                                                                                                                                                                                                                                                                |

|                                |                                                                                             |                                 |                                                                                                                                            |                                                 |                                                                                                                                                                                              |
|--------------------------------|---------------------------------------------------------------------------------------------|---------------------------------|--------------------------------------------------------------------------------------------------------------------------------------------|-------------------------------------------------|----------------------------------------------------------------------------------------------------------------------------------------------------------------------------------------------|
|                                | regret scale<br>(J.C. Brehaut et al)                                                        |                                 | negative emotion.                                                                                                                          |                                                 | Reliability:<br>Cronbach's alpha: 0.81-0.92<br><br>Construct validity:<br>Scale correlates with satisfaction with the decision, decisional conflict and overall rated quality of life.       |
| <b>Decisional satisfaction</b> | Well validated scale:<br><br>Satisfaction with decision scale<br><br>M. Holmes-Rovner et al | Satisfaction with decision made | Higher satisfaction a very positive emotion. Satisfaction with a decision is thought to predict patients' certainty to carry out decision. | Six statements rated on a 5-point Likert scale: | Frequently used:<br><br>Reliability:<br>Cronbach's alpha = 0.86<br><br>Construct validity:<br>Scale correlates with decisional conflict, confidence in decision, knowledge and other scales. |
| <b>Decisional</b>              | Well validated                                                                              | Two forms of anxiety:           | Anxiety (with a decision)                                                                                                                  | Fourty statements rated                         | Extensive use in                                                                                                                                                                             |

|                |                                                                                  |                                  |                                                                        |                                                                                                                 |                                                                                                   |
|----------------|----------------------------------------------------------------------------------|----------------------------------|------------------------------------------------------------------------|-----------------------------------------------------------------------------------------------------------------|---------------------------------------------------------------------------------------------------|
| <b>anxiety</b> | instrument<br>(C.D. Spielberger et al):<br>State Trait Anxiety Inventory (STAI). | State anxiety and trait anxiety. | may lead to dissatisfaction with care and discontinuation of treatment | on a 4-point Likert scale.<br>Twenty items were developed for 'trait anxiety' and 20 items for 'state anxiety'. | assessment of anxiety and depression, less frequently used in relation to shared decision making. |
|----------------|----------------------------------------------------------------------------------|----------------------------------|------------------------------------------------------------------------|-----------------------------------------------------------------------------------------------------------------|---------------------------------------------------------------------------------------------------|

Brehaut JC, O'Connor AM, Wood TJ, Hack TF, Siminoff L, Gordon E, Feldman-Stewart D. Validation of a decision regret scale. *Med Decis Making*. 2003 Jul-Aug;23(4):281-92.

Holmes-Rovner M, Kroll J, Schmitt N, Rovner DR, Breer ML, Rothert ML, Padonu G, Talarczyk G. Patient satisfaction with health care decisions: the satisfaction with decision scale. *Med Decis Making* 1996; Jan-Mar; 16(1):58-64. doi: 10.1177/0272989X9601600114.

O'Connor AM. Validation of a decisional conflict scale. *Med Dec Making* 1995; 15(1): 25-30

O'Connor AM. User Manual – Decisional Conflict Scale (16 item statement format). Ottawa: Ottawa Hospital Research Institute; 1993. Available at [http://decisionaid.ohri.ca/docs/develop/User\\_Manuals/UM\\_Decisional\\_Conflict.pdf](http://decisionaid.ohri.ca/docs/develop/User_Manuals/UM_Decisional_Conflict.pdf).

O'Connor AM. User Manual – Decision Regret Scale. Ottawa: Ottawa Hospital Research Institute, 1996. Available at [http://decisionaid.ohri.ca/docs/develop/User\\_Manuals/UM\\_Regret\\_Scale.pdf](http://decisionaid.ohri.ca/docs/develop/User_Manuals/UM_Regret_Scale.pdf)

Spielberger CD, Gorsuch RL, Lushene RE. The state-trait anxiety inventory. Palo Alto, California: Consulting Psychologists Press, 1969.



## Figure S1: Subgroup analysis for decisional conflict and knowledge stratified according to cardiac condition

### A) Cardiac devices (e.g. ICDs) and left ventricular assist devices (LVAD) – decisional conflict

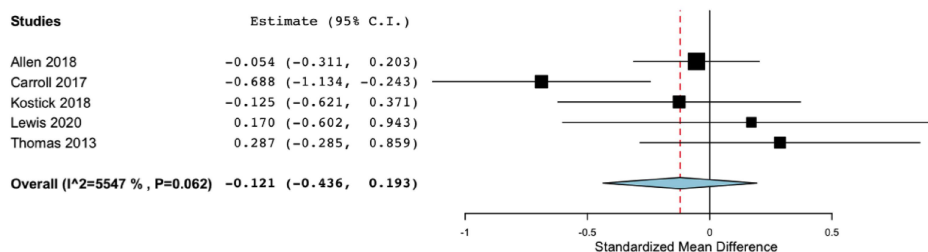

### B) Coronary artery disease – decisional conflict

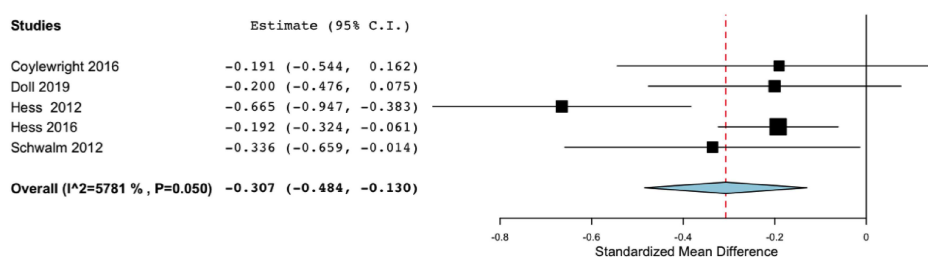

### C) Atrial fibrillation – decisional conflict

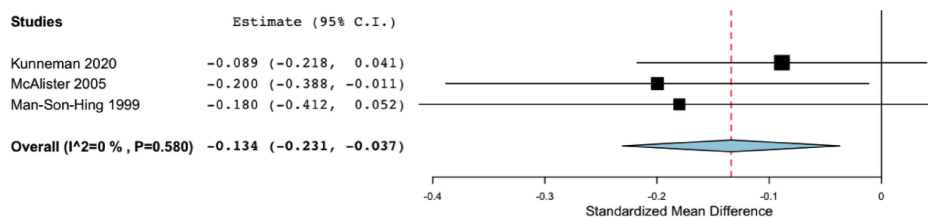

### D) Cardiac devices (e.g. ICDs) and left ventricular assist devices (LVAD) – knowledge

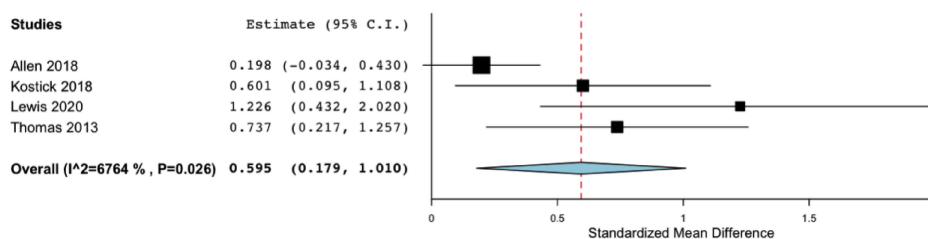

### E) Coronary artery disease – knowledge

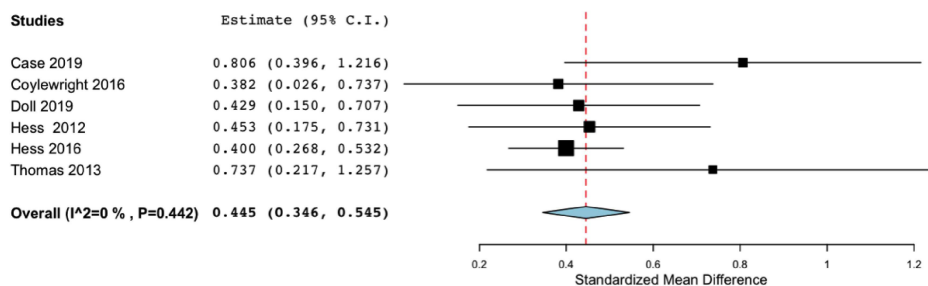



## Figure S2: Subgroup analysis for decisional conflict and knowledge stratified according to decision aid used

### A) Printed decision aids – decisional conflict

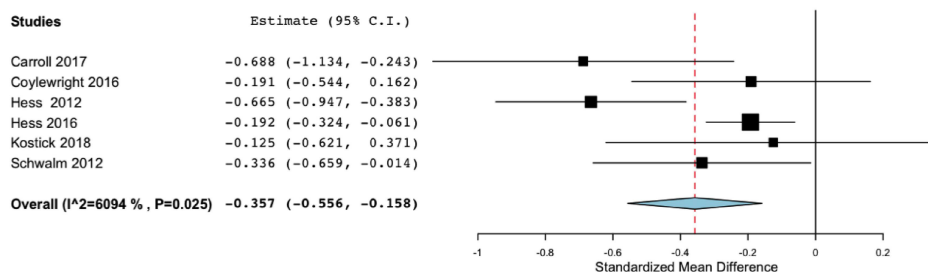

### B) Computer or web-based decision aids – decisional conflict

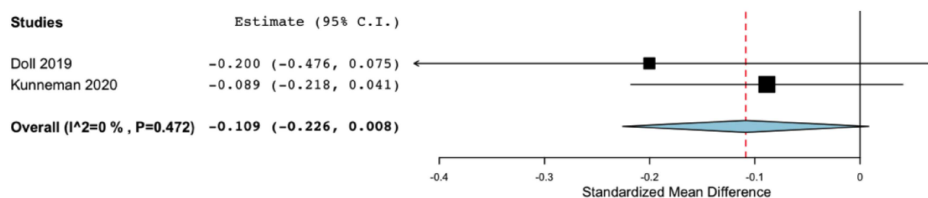

### C) Mixed and other decision aids – decisional conflict

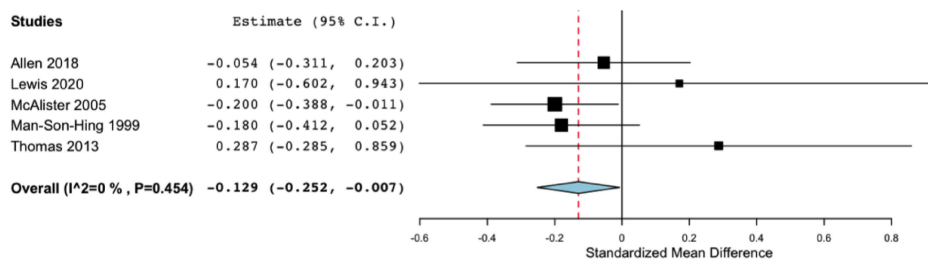

### D) Printed decision aids – knowledge

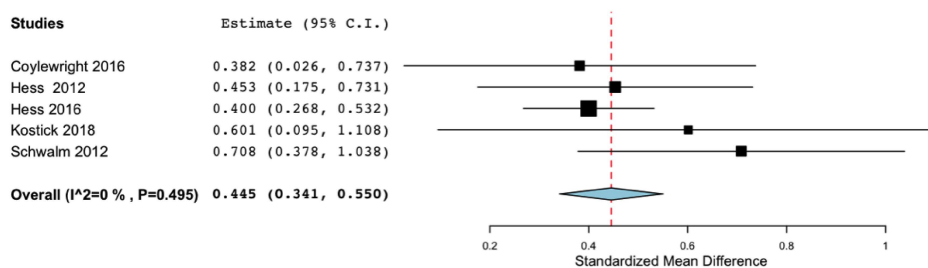

### E) Computer or web-based decision aids – knowledge

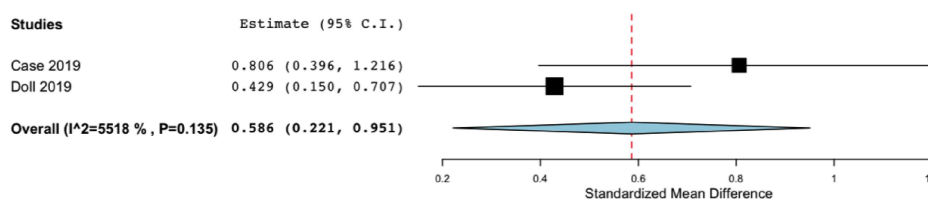

F) Mixed and other decision aids – knowledge

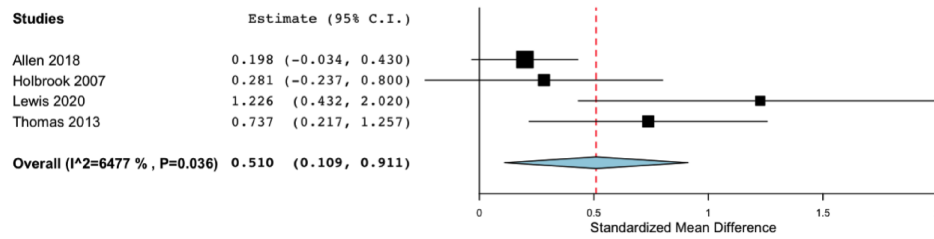

Figure S3: Leave-one-out sensitivity analysis

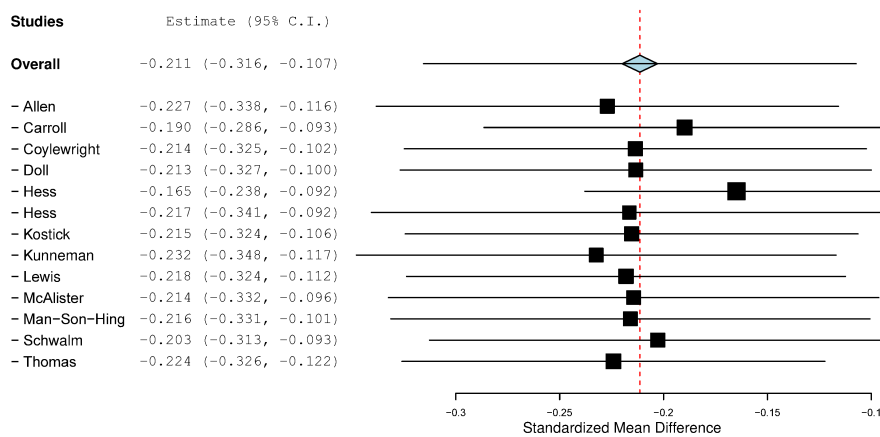

Supplement: heartjnl-2022-321050supp001_data_supplement.pdf [file heartjnl-2022-321050supp001_data_supplement.pdf]
